# Differences in functional connectivity distribution after transcranial direct-current stimulation: a connectivity density point of view

Bohao Tang, Yi Zhao, Archana Venkataraman, Kyrana Tsapkini, Martin A Lindquist, James Pekar, Brian Caffo  
*Maryland, United States*

---

## Abstract

In this manuscript we consider the problem of relating functional connectivity measurements viewed as statistical distributions to outcomes. We demonstrate the utility of using the distribution of connectivity on a study of resting state functional magnetic resonance imaging association with an intervention. Specifically, we consider 47 primary progressive aphasia (PPA) patients with various levels of language abilities. These patients were randomly assigned to two treatment arms, tDCS (transcranial direct-current stimulation and language therapy) vs sham (language therapy only), in a clinical trial. We propose a novel approach to analyze the effect of direct stimulation on functional connectivity. We estimate the density of correlations among the regions of interest (ROIs) and study the difference in the density post-intervention between treatment arms. We discover that it is the tail of the density, rather than the mean or lower order moments of the distribution, that demonstrates a significant impact in the classification. This approach has several benefits. Among them, it drastically reduces the number of multiple comparisons compared to edge-wise analysis. In addition, it allows for the investigation of the impact of functional connectivity on the outcomes where the connectivity is not geometrically localized.

*Keywords:* Functional Connectivity, Density Regression, Random Graph

---

## 1. Introduction

1     The study of resting state brain connectivity via functional magnetic resonance im-  
2     aging (fMRI) involves the investigation of correlations between cortical seeds, regions or  
3     voxels (henceforth referred to as foci). Friston, in particular, defined functional connec-  
4     tivity as the correlations, over time, between spatially distinct brain regions [1]. Nearly all  
5     inter-subject investigations of connectivity have focused on *localized correlations*. That is,  
6     they consider correlations between foci treated consistently across subjects. Mathemati-  
7     cally, this can be described as saying that the methods are not invariant to subject-specific  
8     relabeling of the foci. In fact, for most methods, such as pairwise regressions on corre-  
9     lations across subjects or decomposition methods, shuffling foci labels within subjects is  
10    a form of null distribution. Furthermore, this lack of invariance applies regardless of the  
11    degree of granularity of the analysis (seed, region, voxel ...) [1, 2, 3]. The methods and  
12    choice of granularity all center the focus on geographic consistency of correlations across  
13

---

*Email address:* [bhtang@jhu.edu](mailto:bhtang@jhu.edu) (Bohao Tang)

14 groups of similar subjects. A notable exception is some variations of graph theory based  
15 methods, where graphical summaries may not be localized across subjects in the sense of  
16 being invariant to subject-specific foci labels [4, 5].

17 In this manuscript, we consider the distribution of resting state correlations and how  
18 these correlations vary between treatment arms. This form of density regression has sev-  
19 eral benefits. A primary one is the relaxation of the consistent localization assumption  
20 across subjects. Specifically, localization analyses makes the, often unchallenged, as-  
21 sumption that pairs of foci represent the same correlated functional specialization across  
22 exchangeable subjects. This assumption is grounded in the neurological theory of func-  
23 tional specialization dating back to the foundational works of Broca and Weirnicke [6, 7].  
24 However, it is clear that in specific applications and biological settings, the neural geog-  
25 raphy of functional specialization can vary. As an extreme example, subjects with brain  
26 damage in their youth often have the neuroplasticity that remaps a function to atypical  
27 areas [8].

28 There are existing studies that focus on utilizing the distribution of resting state  
29 correlations. For example, Petersen [9] considers the distribution of correlations between  
30 a seed voxel and all other voxels within a region of interest (ROI), to summarise the state  
31 of such ROI. Also, Scheinost [10] further considered such distributions across all pairs of  
32 voxels. This work derived a degree function from the connection density as a summary  
33 of the connectivity of each voxel. As a result, the study continues to focus on localized  
34 effects, where the use of the connectivity density is mainly to achieve a more informative  
35 localized summary of brain connectivity.

36 Our study is motivated by a resting-state fMRI study of primary progressive aphasia  
37 (PPA) patients, where it is feasible to relax the geometric localization assumption. In the  
38 study, the patients were randomly assigned into two treatment groups, tDCS (transcranial  
39 direct-current stimulation [11] + language therapy) and sham (language therapy only).  
40 In the tDCS group, the stimulation target, the left inferior frontal gyrus (IFG), is less  
41 likely to satisfy the across-subject localization assumption due to spatial normalization  
42 and brain functional specialization. In addition, the stimulation electrode patches were  
43 big,  $5 \times 5 = 25 \text{ cm}^2$ , thus, the stimulation areas were extended beyond the left IFG. This  
44 may induces additional variation across subjects, and thus may result in violations of  
45 localization assumptions. Here, we propose a novel approach to represent the effect of  
46 stimulation on functional connectivity. By ignoring the spacial heterogeneity, we directly  
47 study the change on the distribution of correlation between the regions of interest (ROIs)  
48 and therefore the approach has the potential to be highly robust to spatial registration.

49 In following section 2, we will introduce the experimental design and our approach.  
50 Results both for simulation and real data will be shown in section 3. And section 4  
51 contains an overall discussion about the paper.

## 52 **2. Material and Methods**

### 53 *2.1. Experimental Design*

54 The data analyzed in this study were part of a larger crossover study on aphasia  
55 treatment using tDCS. All of the analyzed subjects had at least two years of progressive  
56 language deficit and no history of any other neurological condition that may have affected  
57 their language ability. Subjects had atrophy predominantly in the left hemisphere. Sub-  
58 jects were diagnosed via neuropsychological testing, language testing, MRI and clinical  
59 assessment according to consensus criteria [12]. The study was approved by the Johns

60 Hopkins Hospital Institutional review board and all subjects provided informed consent  
61 to participate in the study.

62 A total of 50 right handed, native English speaking patients had a pre-intervention  
63 scan (scan1), 48 had a post-intervention scan (scan2). One patient was deleted from  
64 the analysis because of missing values in the connectivity matrix. Among the remaining  
65 47 post-intervention scanned patients, 25 had transcranial direct-current stimulation +  
66 language therapy and the remaining 22 patients had only language therapy. Several base-  
67 line covariates were recorded including: gender, disease onset (years), age at the start of  
68 therapy and language severity. These patients were diagnosed with three variant types,  
69 including the logopenic, the nonfluent, and the semantic, based on brain functions com-  
70 promised, which reflects brain areas that show initial atrophy. Patients with *Logopenic*  
71 variant PPA (lvPPA) present with word-finding difficulties and disproportionately im-  
72 paired sentence repetition. Patients with *nonfluent* variant PPA (nfvPPA) present with  
73 difficulty producing grammatical sentences and/or motor speech impairment (apraxia  
74 of speech). Finally, patients with *semantic* variant PPA (svPPA) present with fluent  
75 speech, but impaired word comprehension. See Table 1 for a summary of demographic  
76 and clinical information on the participants.

|                   | Combined (n = 47) | tDCS (n = 25) | Sham (n = 22) | P-value |
|-------------------|-------------------|---------------|---------------|---------|
| Sex               | 22F, 25M          | 11F, 14M      | 11F, 11M      | 0.773   |
| PPA variant       | 15L, 23N, 9S      | 9L, 12N, 4S   | 6L, 11N, 5S   | 0.801   |
| Age               | 67.3 (6.8)        | 65.8 (8.1)    | 69.1 (5.0)    | 0.146   |
| Year post onset   | 4.2 (2.8)         | 4.3 (3.2)     | 4.0 (2.3)     | 0.722   |
| Language severity | 1.7 (0.8)         | 1.7 (0.9)     | 1.8 (0.8)     | 0.719   |
| Total severity    | 6.3 (4.5)         | 5.7 (3.9)     | 7.0 (5.2)     | 0.597   |

Table 1: Patient demographics. For age, years post onset, severity, values shown are mean (standard deviation). P-values are from the Welch two sample t-tests for continuous outcomes and Fisher’s exact test for categorical outcomes. Language severity is based on the language subset from the FTD-CDR scale. Total severity refers to the sum of boxes, including language and behavior as added in [13].

## 77 2.2. Data Preprocessing

78 MRI scans were obtained at the Kennedy Krieger Institute at Johns Hopkins Uni-  
79 versity, using a 3 T Philips Achieva MRI scanner equipped with a 32-channel head coil.  
80 Resting-state fMRI (rsfMRI) data were acquired for approximately 9 min (210 time-point  
81 acquisitions) post-intervention. We used a 2D EPI sequence with SENSE partial-parallel  
82 imaging acceleration to obtain an in-plane resolution of  $3.3 \times 3.3 \text{ mm}^2$  ( $64 \times 64$  voxels;  
83 TR/TE = 2500/30 ms; flip angle =  $75^\circ$ ; SENSE acceleration factor = 2; SPIR for fat  
84 suppression, 3 mm slice thickness). The data were co-registered with structural scans  
85 into the same anatomical space. Structural scans, acquired axially with a scan time of  
86 6 min (150 slices), used a T1-weighted MPRAGE sequence with 3D inversion recovery,  
87 magnetization-prepared rapid gradient, isotropic with a resolution of  $1 \times 1 \times 1 \text{ mm}^3$

88 (FOV =  $224 \times 224$  mm<sup>2</sup>; TR/TE = 8.1/3.7 ms; flip angle = 8°; SENSE acceleration  
89 factor = 2).

90 Using MRICloud, a cloud-platform for automated image parcellation approach (atlas-  
91 based analysis (ABA)), the MPRAGE scan was parcellated into 283 structures [14]. In  
92 detail, each participant’s high resolution MPRAGE was segmented by using a multi-atlas  
93 fusion label algorithm (MALF) and large deformation diffeomorphic metric mapping,  
94 LDDMM [15, 16, 17]. This highly accurate diffeomorphic algorithm, associated with  
95 multiple atlases, minimizes the mapping inaccuracies due to atrophy or local shape de-  
96 formations. All analyses were performed in native space. To control for relative regional  
97 atrophy, volumes for each ROI were normalized by the total intracerebral volume (total  
98 brain tissue without myelencephalon and cerebrospinal fluid). The resting-state fMRI was  
99 also processed in MRICloud and analyzed in a seed-by-seed manner. The image process-  
100 ing was described in our previous publication [18] including routines imported from the  
101 SPM connectivity toolbox for coregistration, motion, and slice timing correction; phys-  
102 iological nuisance correction using CompCor [19]; and motion and intensity TR outlier  
103 rejection using “ART” ([https://www.nitrc.org/projects/artifact\\_detect/](https://www.nitrc.org/projects/artifact_detect/)). The  
104 MRICloud pipeline follows well established steps for rsfMRI processing: after exclusion of  
105 “outlier” TRs, detected by ART routine (parameters: 2 standard deviations for motion  
106 and 4 standard deviations for intensity, more severe than the default of 9), the movement  
107 matrix combined with the physiological nuisance matrix is used in the deconvolution re-  
108 gression for the remaining TRs. These two steps for motion correction (outlier rejection  
109 and regression of motion parameters) ensure the minimization of the motion effect. The  
110 parcels resultants from the high resolution T1 segmentation were brought to the resting  
111 state dynamics by co-registration. Time-courses of 78 cortical and deep gray matter ROIs  
112 were extracted and the correlations among them were calculated.

### 113 2.3. Density regression

114 We propose to quantify the effect of possibly non-localized stimulation on functional  
115 connectivity through a density regression. We make the assumption that the connectivity  
116 matrix  $\mathbf{C}_i$  of patient  $i$  is the adjacency matrix of a random weighted graph, for  $i =$   
117  $1, \dots, n$ , and  $n$  is the number of subjects. For all pairs of elements in the set  $\{(s, t; i) \mid s <$   
118  $t \leq N\}$ , where  $N$  is the number of nodes in the graph, we have:

$$\mathbf{C}_i(s, t) \stackrel{ind}{\sim} f_i, \quad (1)$$

119 where  $f_i$  is a density function. We refer to this density as the *connectivity density* of  
120 subject  $i$ . The process of proceeding from fMRI scans to the connectivity density is  
121 outlined in Figure 1. We estimate connectivity matrix from temporal correlation of  
122 BOLD signals between regions of interest (ROIs) after parcellation. And then estimate  
123 the connectivity density. In practice, one can use the vectorized elements in the upper  
124 triangular portion of the connectivity matrix to estimate the density using smoothing  
125 splines [20], which performs a maximum likelihood estimation on the spline coefficients  
126 for estimating the logarithm of the density function under a smoothness penalty. We  
127 choose this approach as it directly returns the splines, which are both mathematically  
128 and practically convenient, especially for performing a functional regression. In addition,  
129 it sets a boundary of the support for the estimated density, which is beneficial to our case  
130 as correlation coefficients are bounded between  $-1$  and  $1$ . Kernel density estimators [21]  
131 are also implemented as a comparison.

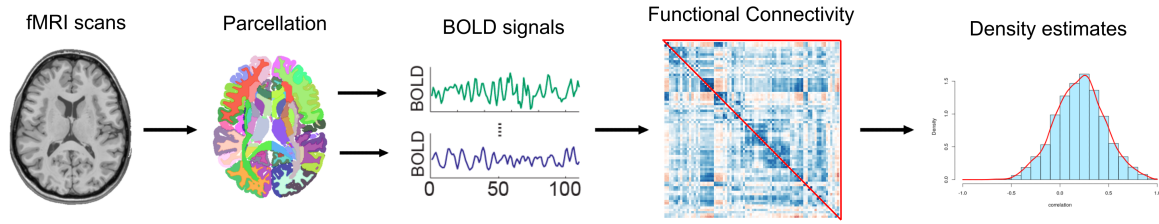

Figure 1: From MRI scan to connectivity density

132 Our proposal is to use  $f_i$  to characterize  $\mathbf{C}_i$  and subsequently study the relationship  
 133 between  $f_i$  and variables of interest. In the tDCS study, the variable of interest is the  
 134 treatment status. Since the  $\{f_i\}$  are (infinite dimensional) functional data, we employ  
 135 functional data analysis tools [22, 23, 24]. Logically, one would model that treatment  
 136 status predicts connectivity. However, treating complex data as covariates is often more  
 137 convenient than treating them as the outcomes. Therefore, we adopt the ideas in case-  
 138 control inverse regression [25, 26], and predict whether a subject is in the treatment arm  
 139 using the connectivity density and the baseline covariates as predictors. Let  $A_i$  denote  
 140 the treatment assignment with  $A_i = 1$  for tDCS and  $A_i = 0$  for sham, and  $\mathbf{X}_i \in \mathbb{R}^q$   
 141 denote the  $q$ -dimensional covariate vector with the first element one for the intercept.  
 142 The linear model considered is the following:

$$\text{logit}\{P(A_i = 1|\mathbf{X}_i, f_i)\} = \mathbf{X}_i^\top \beta + \int T(f_i)g, \quad (2)$$

143 where  $T$  is a given operator from  $\mathcal{L}^2$  to  $\mathcal{L}^2$  aiming to capture a specific characteristic of the  
 144 density functions. The function  $g$  is a coefficient function, and  $\beta \in \mathbb{R}^q$  is the coefficient  
 145 vector of the covariates, both to be estimated.

146 Various choices of  $T$  and the shape of  $g$  have different interpretations on the resulting  
 147 model. For example, setting  $T(f) = f$ , the identity function, the linear predictor is  
 148  $\int T(f_i)g = E[g(Z_i)]$ , where  $E[\cdot]$  is the expectation of a random variable and  $Z_i$  is an  
 149 random variable drawn from  $f_i$ . With a sufficiently flexible choice of  $g$ , mode (2) covers a  
 150 broad range of possible model fits. However, many of them may not focus on tail behavior,  
 151 where effects would likely occur. For example, if  $g$  is a polynomial, the model considers  
 152 the moments of the density (mean, variance, skewness, etc.) as a predictor. However,  
 153 it offers no benefit over the direct usage of the moment estimates of the connectivities.  
 154 Thus, it will not be discussed further, though it does demonstrate a special case of the  
 155 approach.

156 As for the choice of  $T$ , using  $T(f) = \log(f)$  is similar to the use of the identity  
 157 function. It loses the expected value interpretation, while instead, performs regression  
 158 on the space of densities with Aitchison geometry [27]. Thus, it may better detect the  
 159 influence of the tail behavior on the outcome.

160 Another choice is the quantile mapping,  $T_q(f) = F^{-1}$ , where  $F$  is the cumulative  
 161 distribution function associated with the density  $f$ . With a sufficient number of foci, this  
 162 approach is approximately equivalent to using the empirical quantiles of the connectivity  
 163 data as the regressors. Our proposed approach is quite similar to this. However, we  
 164 further propose to weight the quantiles via density quantile. Specifically, we set  $T_{ldq}(f) =$   
 165  $\log \circ f \circ F^{-1} = -\log[(dF^{-1}/dt)^{-1}]$  where  $\circ$  is the function composition operator. The  
 166 latter equality is easy to derive by taking derivatives via the chain rule to the identity  
 167 function,  $F \circ F^{-1}$ . Note that the density quantile  $f \circ F^{-1}$  can be regarded as a quantile

168 synchronized version of density function, and therefore is more sensitive to the changing  
169 tails. And the further logarithm transform maps density quantile to a Hilbert space,  
170 which is essential to linear models. This idea has been explored before as a potentially  
171 preferable method for utilizing quantiles as regressors. Specifically, it is equivalent to the  
172 Hilbert space mapping, suggested by Petersen and Müller [9].

#### 173 *2.4. Reversing the predictor/response relationship*

174 It is typical in regression models to consider the hypothetically functionally antecedent  
175 variable as a predictor, independent or exogenous variable, rather than an outcome, de-  
176 pendent or endogenous variable. A counterexample is in outcome dependent sampling,  
177 such as in retrospective studies. We utilize the same strategy of reversing the typical pre-  
178 dictor / response relationship, as is more convenient for modeling with high dimensional  
179 and complex quantities (such as brain connectivity) as the predictor. In the tDCS study,  
180 we model treatment assignment as the outcome using a logit model with the connectiv-  
181 ity density and other covariates as the independent variables. This avoids the need to  
182 construct probability distributions on the connectivity densities themselves.

To elaborate, using Bayes' rule and the fact of a randomization design,  $P(A_i = 1) = P(A_i = 0) = 0.5$ , for any function  $g$  and transformation  $T$ , we have:

$$\text{Odds}(A_i = 1 | \mathbf{X}_i, \langle T(f_i), g \rangle) = \frac{P(\langle T(f_i), g \rangle | A_i = 1, \mathbf{X}_i)}{P(\langle T(f_i), g \rangle | A_i = 0, \mathbf{X}_i)},$$

183 where  $\langle \cdot, \cdot \rangle$  is any inner product of two functions. In our application we consider logit  
184 models on  $P(A_i = 1 | \mathbf{X}_i, T(f_i))$ , which depends on  $f_i$  only through the form  $\langle T(f_i), g \rangle$ . As  
185 the above relationship shows, our treatment assignment outcome model,  $P(A_i | \mathbf{X}_i, T(f_i))$ ,  
186 is consistent with any connectivity outcome model,  $P(\langle T(f_i), g \rangle | A_i, \mathbf{X}_i)$ , where the like-  
187 lihood ratio comparing treated to controls is approximately log linear with our linear  
188 separable density model given in Equation 2.

#### 189 *2.5. Estimation of the coefficient function*

190 To estimate the coefficient function,  $g$  in model (2), we perform a functional principal  
191 components analysis (fPCA) [28]. This reduces the dimension of the functional regressor  
192 using a set of data-derived basis. In this approach, one calculates the PCA decompo-  
193 sition of the functions,  $\{f_i\}$ , using the Karhunen/Loève transformation [29], where the  
194 covariance function is smoothed [30] and selects the leading principal components that  
195 explain over 99% of the variation as the basis functions. Notice that, the version of fPCA  
196 utilized here does not honor possible density implied constraints of the  $T(f_i)$ . General-  
197 ized cross validation (GCV) is commonly used to choose the smoothing parameters [for  
198 detailed discussion, see Section 4.5.4 of 31]. Confidence bands are derived using a Bayes  
199 approach. [32, 33, 24].

#### 200 *2.6. Comparison*

201 To illustrate the benefit of conducting a delocalized analysis, a simulation study based  
202 on the fMRI data collected in the tDCS study is conducted. We consider an extreme  
203 example that demonstrates an example where non-localized brain stimulation decreases  
204 statistical power, or even makes it impossible to identify ROI pairs with a significant  
205 effect when implementing a localization method. However, using connectivity densities  
206 retains the relevant information.

207 In the simulation, consider a brain connectivity map with 20 regions,  $R_1 \dots R_{20}$ , a  
 208 transcranial stimulation that randomly “stimulates” region  $R_i$  with equal probability  
 209 across  $i$ . After stimulation, the correlations of  $R_i$  with all other regions are flipped, with  
 210 the remaining region pairs unchanged. The mean and variance of the stimulated data are  
 211 constant across stimulation, mimicking the actual tDCS data. Thus, the stimulation does  
 212 not impact the first two moments of connectivity and has a very weak localized effect by  
 213 randomly stimulating different spaces. However, stimulating any region has a consistent  
 214 impact to connectivity density. This simulation is, of course, an extreme caricature of a  
 215 non-localized effects in real data.

216 We sampled 100 pre-stimulation maps from the pre-intervention scans and then sim-  
 217 ulated 100 post-stimulating maps according to above mechanism. Then, we tested the  
 218 significance of edgewise testing, the LASSO and density regression, with different trans-  
 219 formations. We performed 500 such simulations. For completeness, we also considered  
 220 these methods when there was no change from before to after stimulation and when the  
 221 stimulation was localized at a particular region. In the real tDCS data, the density meth-  
 222 ods are compared with regressing connectivity matrix by comparing edges associated with  
 223 the estimated connectivity from pairs of foci.

224 The edgewise regression approach considers the following model:

$$\text{logit}\{P(A_i = 1|\mathbf{X}_i, f_i)\} = \mathbf{X}_i^\top \beta + \mathbf{C}_i(s, t)\alpha_{st}, \quad (3)$$

225 where  $s > t$ . The second competing approach considered was a regression model with  
 226 high-dimensional predictors:

$$\text{logit}\{P(A_i = 1|\mathbf{X}_i, f_i)\} = \mathbf{X}_i^\top \beta + \mathbf{C}_i^f \alpha, \quad (4)$$

227 where  $\mathbf{C}_i^f$  is the vectorization of the upper triangular portion of  $\mathbf{C}_i$ . A LASSO regular-  
 228 ization was imposed and high-dimensional inferences were drawn following the procedure  
 229 introduced by Dezeure et al.[34] We refer to this model as the LASSO model.

### 230 3. Results

#### 231 3.1. Simulation

232 Figure 2 shows example connectivity maps and fitted functional regressors from an  
 233 example simulation, one where stimulation was present and one where it was absent.  
 234 We report the rate of positive findings for all methods. Results are shown in Table 2.  
 235 Localization methods do not find significant region pairs in the non-localized simulations.  
 236 However, the density method detects the stimulation impact on the connectivity densities.

|                | Bonferroni | FDR  | BY    | $T_0$ | $T_l$ | $T_{ldq}$ |
|----------------|------------|------|-------|-------|-------|-----------|
| Non-Localized  | 0.03       | 0.03 | 0.004 | 1.00  | 1.00  | 1.00      |
| Localized      | 1.00       | 1.00 | 1.00  | 1.00  | 1.00  | 1.00      |
| No-Stimulation | 0.01       | 0.01 | 0.00  | 0.05  | 0.07  | 0.04      |

Table 2: This table shows the rate of positive findings over 500 simulations.  $T_0, T_l, T_{ldq}$  are the identity, logarithm and log density-quantile transformations described in section 2.3. Bonferroni, FDR [35] and BY [36] refer to multiplicity correction procedures. LASSO testing, were implemented by the package hdi [37].

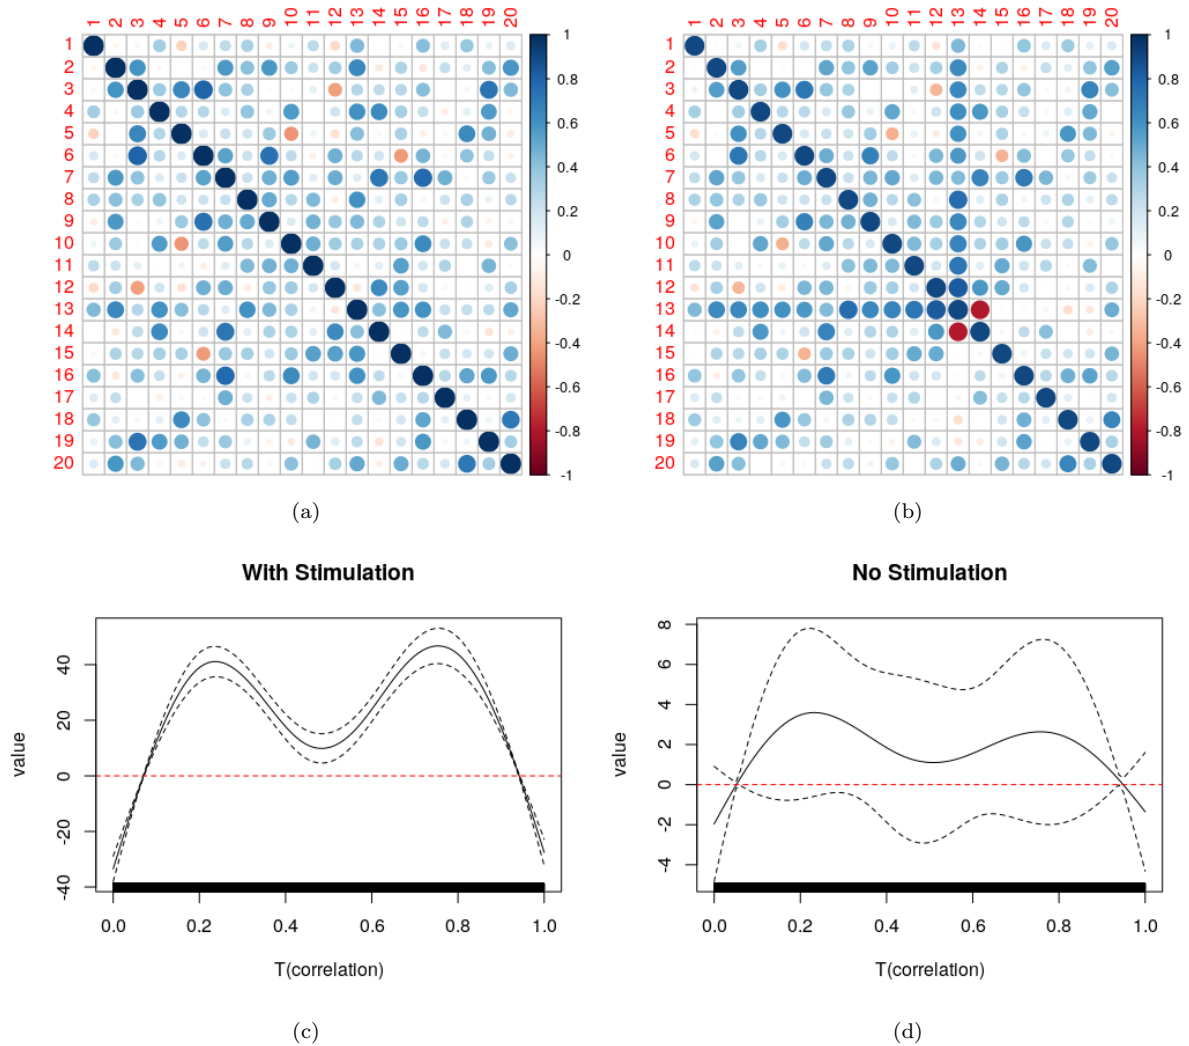

Figure 2: Example simulation results, where (a) and (b) show simulated pre- and post-stimulation connectivity maps. Image (c) shows the regression coefficient function and its 95% confidence interval when there's stimulation. The regression model uses the log density quantile function. Image (d) shows the same curve when there's no stimulation.



### 237 3.2. Analysis of the tDCS data using edgewise testing & LASSO

238 For the tDCS data, we also tested the significance of edgewise regression [models (3),  
239 (4)] and a joint model of the upper-triangular component of  $\mathbf{C}_i$ . No foci-pair was identified  
240 as significant in either regression model, at Type I error rate levels of 0.05 or 0.1. Of note,  
241 previous localization work on related data [38], yields significant findings. However, the  
242 total number of regions were restricted, thus dramatically reducing multiplicity concerns.  
243 In this analysis, 78 regions were used, resulting in a more stringent correction factor. In  
244 addition, a more restrictive inclusion criteria in [38] led to a different study population.

### 245 3.3. Analysis of the tDCS data using the density regression

246 In this section, we present the analysis results of the tDCS study using the density  
247 regression (Model (2)) with different transformations ( $T$ ). The fitted coefficient function,  
248  $g$ , and its 95% confidence interval are presented in Figure 3. Functional linear regression  
249 was performed using the `refund` R-package with default parameter of smoothed covari-  
250 ance fPCA, which chooses the number of components that explains over 99% of the data  
251 variation.

252 Regressing on the density after applying the log-density quantile transform yields  
253 the highest number of significant signals, which reaches its maximum around the 85<sup>th</sup>  
254 percentile. This potentially indicates that stimulation has a consistent tail effect which  
255 is more likely to be aligned by quantile, rather than absolute value. Since the estimated  
256 coefficient function is significantly non-zero only in the positive tail this suggests that the  
257 tDCS group had higher connection densities in the tail than the sham group. That is,  
258 connectivity among the most connected regions was higher in the tDCS group.

259 A likelihood ratio test was performed to compare logistic regression with only baseline  
260 variables and our log-quantile model including both the baseline variables and the log  
261 density quantile term. The resulting p-value was 0.0052, indicating a statistically signif-  
262 icant gain of information from connectivity density at the 0.05 benchmark type I error  
263 rate.

### 264 3.4. Induced Connectivity

Consider the best model using the log density quantile transform,  $T_{ldq}$ . We have

$$\text{logit}\{P(A_i = 1|\mathbf{X}_i, f_i)\} = \mathbf{X}_i^\top \beta + \int_0^1 \log[f_i \circ F_i^{-1}(q)]g(q)dq.$$

Notice that for the connectivity matrix,  $\mathbf{C}_i$ , we have  $F_i\{\mathbf{C}_i\} \sim U(0, 1)$ , a uniform distri-  
bution on  $[0, 1]$  via the probability integral transform. Let  $\mathbf{Q}_i(s, t) = F_i\{\mathbf{C}_i(s, t)\}$ . Then  
it follows that:

$$\begin{aligned} \int_0^1 \log[f_i\{F_i^{-1}(q)\}]g(q)dq &= \mathbb{E}[g(\mathbf{Q}_i) \log f_i\{F_i^{-1}(\mathbf{Q}_i)\}] \\ &\asymp \frac{2}{N(N-1)} \sum_{t>s} g\{\mathbf{Q}_i(s, t)\} \log f_i[F_i^{-1}\{\mathbf{Q}_i(s, t)\}]. \end{aligned}$$

265 Therefore, for this subject, one can assign  $g\{\mathbf{Q}_i(s, t)\} \log f_i[F_i^{-1}\{\mathbf{Q}_i(s, t)\}]$  as the effect  
266 size for region pair  $(s, t)$ . Averaging this effect across all patients yields an importance  
267 metric for every region pair in the model. We call this stimulation induced connectiv-  
268 ity, since it describes how influential the correlation of each region pair is in predicting  
269 stimulation status. The induced connectivity matrix is shown in Figure 4 together with

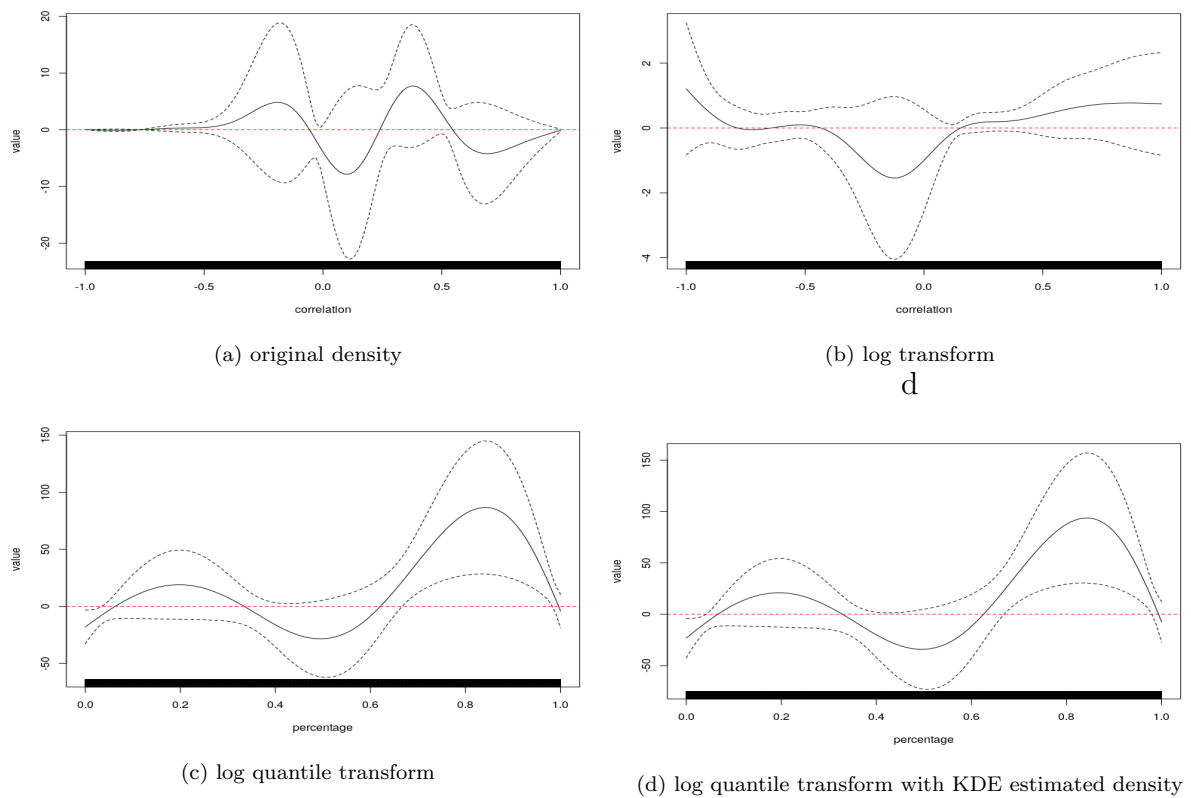

Figure 3: Model results on the tDCS experiment. The black solid line is the fitted coefficient function,  $g$ , with the black dashed line referencing the associated 95% confidence interval. Densities were estimate from smoothing splines implemented in the **fd** R-package with 19 degrees of freedom for the spline basis. A kernel density estimator (KDE, Figure 3d) is also computed and compared with smoothing spline (Panel 3c) method. Contrasting 3c and 3d shows that the density estimation technique did not impact results.

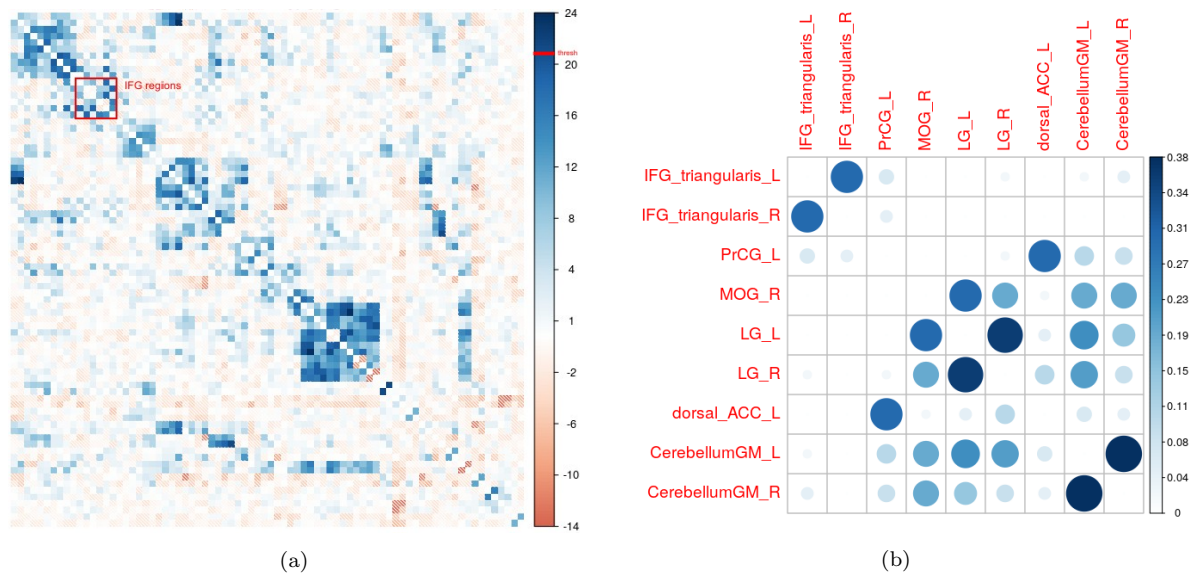

Figure 4: Figure 4a shows the induced connectivity described in section 3.4. IFG regions (which were applied tDCS) are noted in the red box. And figure 4b shows some region pairs with most consistent contribution, measured by the frequency of having top 5% absolute effect size across all patients. Again, IFG regions were the ones applied tDCS

270 a summary of effect agreement across subjects, where for each patient, region pairs are  
 271 selected with top 5% absolute effect size. And the frequency of each region pair being  
 272 selected is calculated.

273 This technique, of course, returns to a discussion of localized effects. However, by  
 274 investigating this measure one can ascertain the degree of localization consistency across  
 275 subjects - an impossibility with pure localization analysis.

#### 276 4. Discussion

277 In this manuscript, a new framework for analysing functional connectivity was pro-  
 278 posed. Functional data analysis of log quantile connectivity densities investigates possible  
 279 non-localized effects associated with subject level variables. A sizable byproduct of this  
 280 style of analysis is the general elimination of multiplicity considerations. This is of great  
 281 importance in connectivity analysis, where the number of comparisons grows at a rate  
 282 of the square of the number of foci being considered. In the data application, we find  
 283 associations with stimulation and connectivity density. In contrast, edgewise methods  
 284 fail to find any results purely because of the multiplicity issue. This is partially due to a  
 285 wide search of all possible region pairs from the parcellation. Of course, one could also  
 286 reduce multiplicity concerns by restricting attention to regions associated with a priori  
 287 hypotheses of interest, as was done in [38]. In contrast, investigating connection densi-  
 288 ties is an omnibus approach that benefits from a reduction in the number of tests over  
 289 exploratory edge-wise approaches, a robustness to non-localized effects and a robustness  
 290 to the inclusion of unnecessary foci. These benefits come at the expense of the loss of  
 291 power and interpretability over analyses considering only a small set of tightly specified  
 292 edge-wise hypotheses.

293 An interesting direction to pursue with connectivity density methods is to consider  
 294 robustness to spatial registration [39]. The connectivity density should be largely in-  
 295 variant to registration. In contrast, localization methods heavily rely on both accurate

296 registration and accurate biological functional localization across subjects. Therefore,  
297 density regression could be performed after affine registration typically done prior to the  
298 more time consuming non-linear registration.

299 We used functional data analysis to relate connection densities to outcomes. Func-  
300 tional data analysis tools [23] have grown to be quite flexible. Thus, density regression  
301 approaches can be relatively easily generalized to handle different settings, such as any  
302 typical statistical outcome model and longitudinal data. Also, density estimates may  
303 naturally make adjustments for missing data, in the form of missing foci, since the den-  
304 sity can remain the same in some contexts. This has potential broad implications for the  
305 study of stroke and other diseases with abnormal brain pathology. Localization methods  
306 are not available if the region of interest is damaged or missing. In contrast, density  
307 based methods are easy to apply.

308 Statistically, we assumed independence between subjects and relied on the random-  
309 ization to invert the predictor / response relationship using logit models. This borrows  
310 techniques from case referent sampling from epidemiology dating back to the seminal  
311 work of Cornfield [40, 41]. Independence between subjects was used for inference. We  
312 also used density estimates for connection densities, techniques that implicitly require  
313 sampling assumptions for theoretical convergence. However, we contend that connectiv-  
314 ity densities are intrinsically of interest, and therefore no appeals to super-population  
315 inference and sampling assumptions are needed for estimation. This is analogous to spa-  
316 tial group ICA, where productive estimates are obtained via independence assumptions  
317 on voxels over space, without a true sampling or super-population model for inference  
318 [42]. An interesting future direction of research would investigate dependencies between  
319 foci correlations.

320 Our recommended approach uses log quantile densities as the functional predictor,  
321 rather than the density, distribution function or quantile function directly [9]. This  
322 approach has convenient theoretical properties, but also the practical benefit of focusing  
323 attention on tail behavior, where effects are most likely to be seen. Utilizing the quantile  
324 density also creates robustness to irrelevant foci pairs being included in the analysis.

325 Our simulations and data results focus on settings that highlight the benefits of an  
326 omnibus density regression approach. In the simulations, we investigated a non-localized  
327 caricature of typical effects. Similarly, in our data analysis, we performed no filtering of  
328 regions prior to analysis (thus magnifying multiple comparison concerns). It was shown in  
329 the simulation, that functional density regression approaches can find real non-localized  
330 effects, whereas, as expected, edgewise methods do not find any. It should be emphasized  
331 that the performance of the density regression approach is invariant to the distribution  
332 of effects across subjects, whereas edgewise approaches become viable as the degree of  
333 localization increases.

334 In addition, the flexibility of the approach finds tail effects in the real data, even  
335 though there are a great deal of irrelevant connections (i.e. unnecessarily included region  
336 pairs) being studied. Edgewise and other regression approaches are highly sensitive to  
337 unnecessary null connections being included in the analysis. A benefit of the data being  
338 considered is the likely existence of an effect related to the stimulation. However, we  
339 emphasize that a single omnibus approach does not represent a full analysis of the data.  
340 We recommend this approach as a global analysis to be performed prior to edgewise  
341 or other localization methods. This mirrors the classic ANOVA (analysis of variance)  
342 approach of performing an overall F test before investigating pairs of explanatory factor  
343 levels. It would most useful in exploratory model building where foci selection is not

344 restrictive. In cases of tightly coupled statistical hypotheses involving relatively few  
345 regions or foci, density regression would not be needed or particularly helpful.

346 This methodology raise many avenues for future research. For example, one the idea  
347 of non-localized effects in dynamic connectivity [43] via stochastic processes of connectiv-  
348 ity densities (by time). In addition, there are multiple alternatives for densities estimated  
349 from correlation of each region pair for contralateral regions. Here, it should be acknowl-  
350 edged that there is strong homotopic correlations from symmetric regions. One should  
351 then deal with multivariate densities estimated from pairs of correlations. This same logic  
352 could be applied to geographically close regions and for instances with longitudinal scans.  
353 The connectivity density of spectral information [44], like leading principal component  
354 scores, should also be studied to potentially extract relevant brain graph properties.

355 Finally, there's the role that connectvity density methods could play in fMRI analysis  
356 of subjects with missing brain tissue, such as studies of stroke or surgical interventions.  
357 Connectivity density methods may be resilient to the missing data impact of differential  
358 brain structure in a way that localization methods are not. In fact, it is interesting  
359 to conjecture what localization methods even mean in these settings where a subset of  
360 subjects are missing areas of localization. In contrast, density methods may provide a  
361 more robust and well defined methodology. It is worthy of note that components of graph  
362 methodology [45, 45, 46] often considers summary metrics that do not require or assume  
363 localization. Density regression can be considered a subset of weighted graph metric  
364 analysis.

## 365 5. Acknowledgments

366 We would like to thank our participants and referring physicians for their dedication,  
367 helpful comments and interest in our study.

368 Funding: All the data reported here were collected through grants from the Science of  
369 Learning Institute at Johns Hopkins University and NIH (National Institute of Deafness  
370 and Communication Disorders) through award R01 DC014475 to KT. A.V. was supported  
371 by National Science Foundation CRCNS award 1822575 and National Science Foundation  
372 CAREER award 1845430. M.A.L. was supported by NIH grants R01 EB016061 and R01  
373 EB026549 from the National Institute of Biomedical Imaging and Bioengineering.

## 374 References

- 375 [1] K. J. Friston, Functional and effective connectivity: a review, *Brain connectivity* 1  
376 (2011) 13–36.
- 377 [2] J. S. Damoiseaux, M. D. Greicius, Greater than the sum of its parts: a review of  
378 studies combining structural connectivity and resting-state functional connectivity,  
379 *Brain Structure and Function* 213 (2009) 525–533.
- 380 [3] A. M. Bastos, J.-M. Schoffelen, A tutorial review of functional connectivity analy-  
381 sis methods and their interpretational pitfalls, *Frontiers in systems neuroscience* 9  
382 (2016) 175.
- 383 [4] D. Koutra, J. T. Vogelstein, C. Faloutsos, Deltacon: A principled massive-graph  
384 similarity function, in: *Proceedings of the 2013 SIAM International Conference on*  
385 *Data Mining*, SIAM, 2013, pp. 162–170.

- 386 [5] J. T. Vogelstein, W. G. Roncal, R. J. Vogelstein, C. E. Priebe, Graph classification  
387 using signal-subgraphs: Applications in statistical connectomics, *IEEE transactions*  
388 on pattern analysis and machine intelligence 35 (2012) 1539–1551.
- 389 [6] P. Broca, Remarques sur le siège de la faculté du langage articulé, suivies d’une  
390 observation d’aphémie (perte de la parole), *Bulletin et Memoires de la Societe*  
391 *anatomique de Paris* 6 (1861) 330–357.
- 392 [7] C. Wernicke, *Der aphasische Symptomencomplex: eine psychologische Studie auf*  
393 *anatomischer Basis*, Cohn., 1874.
- 394 [8] S. Finger, C. R. Almlil, Brain damage and neuroplasticity: mechanisms of recovery  
395 or development?, *Brain Research Reviews* 10 (1985) 177–186.
- 396 [9] A. Petersen, H.-G. Müller, et al., Functional data analysis for density functions by  
397 transformation to a hilbert space, *The Annals of Statistics* 44 (2016) 183–218.
- 398 [10] D. Scheinost, J. Benjamin, C. Lacadie, B. Vohr, K. C. Schneider, L. R. Ment, X. Pa-  
399 pademetris, R. T. Constable, The intrinsic connectivity distribution: a novel con-  
400 trast measure reflecting voxel level functional connectivity, *Neuroimage* 62 (2012)  
401 1510–1519.
- 402 [11] M. A. Nitsche, L. G. Cohen, E. M. Wassermann, A. Priori, N. Lang, A. Antal,  
403 W. Paulus, F. Hummel, P. S. Boggio, F. Fregni, et al., Transcranial direct current  
404 stimulation: state of the art 2008, *Brain stimulation* 1 (2008) 206–223.
- 405 [12] M. L. Gorno-Tempini, A. E. Hillis, S. Weintraub, A. Kertesz, M. Mendez, S. F.  
406 Cappa, J. M. Ogar, J. Rohrer, S. Black, B. F. Boeve, et al., Classification of primary  
407 progressive aphasia and its variants, *Neurology* 76 (2011) 1006–1014.
- 408 [13] D. S. Knopman, J. H. Kramer, B. F. Boeve, R. J. Caselli, N. R. Graff-Radford, M. F.  
409 Mendez, B. L. Miller, N. Mercaldo, Development of methodology for conducting  
410 clinical trials in frontotemporal lobar degeneration, *Brain* 131 (2008) 2957–2968.
- 411 [14] S. Mori, D. Wu, C. Ceritoglu, Y. Li, A. Kolasny, M. A. Vaillant, A. V. Faria,  
412 K. Oishi, M. I. Miller, Mricloud: delivering high-throughput mri neuroinformatics  
413 as cloud-based software as a service, *Computing in Science & Engineering* 18 (2016)  
414 21–35.
- 415 [15] C. Ceritoglu, X. Tang, M. Chow, D. Hadjiabadi, D. Shah, T. Brown, M. H. Burhan-  
416 ullah, H. Trinh, J. Hsu, K. A. Ament, et al., Computational analysis of lddmm for  
417 brain mapping, *Frontiers in neuroscience* 7 (2013) 151.
- 418 [16] M. I. Miller, M. F. Beg, C. Ceritoglu, C. Stark, Increasing the power of functional  
419 maps of the medial temporal lobe by using large deformation diffeomorphic metric  
420 mapping, *Proceedings of the National Academy of Sciences* 102 (2005) 9685–9690.
- 421 [17] X. Tang, K. Oishi, A. V. Faria, A. E. Hillis, M. S. Albert, S. Mori, M. I. Miller,  
422 Bayesian parameter estimation and segmentation in the multi-atlas random orbit  
423 model, *PloS one* 8 (2013) e65591.

- 424 [18] A. V. Faria, S. E. Joel, Y. Zhang, K. Oishi, P. C. van Zijl, M. I. Miller, J. J. Pekar,  
425 S. Mori, Atlas-based analysis of resting-state functional connectivity: Evaluation for  
426 reproducibility and multi-modal anatomy–function correlation studies, *Neuroimage*  
427 61 (2012) 613–621.
- 428 [19] Y. Behzadi, K. Restom, J. Liau, T. T. Liu, A component based noise correction  
429 method (compcor) for bold and perfusion based fmri, *Neuroimage* 37 (2007) 90–101.
- 430 [20] C. Gu, C. Qiu, Smoothing spline density estimation: Theory, *The Annals of Statis-*  
431 *tics* (1993) 217–234.
- 432 [21] B. W. Silverman, *Density estimation for statistics and data analysis*, volume 26,  
433 CRC press, 1986.
- 434 [22] J. O. Ramsay, *Functional data analysis*, *Encyclopedia of Statistical Sciences* 4  
435 (2004).
- 436 [23] J. O. Ramsay, B. W. Silverman, *Applied functional data analysis: methods and case*  
437 *studies*, Springer, 2007.
- 438 [24] M. W. McLean, G. Hooker, A.-M. Staicu, F. Scheipl, D. Ruppert, Functional gener-  
439 alized additive models, *Journal of Computational and Graphical Statistics* 23 (2014)  
440 249–269.
- 441 [25] R. L. Prentice, R. Pyke, Logistic disease incidence models and case-control studies,  
442 *Biometrika* 66 (1979) 403–411.
- 443 [26] K. J. Rothman, S. Greenland, T. L. Lash, *Case–control studies*, *Encyclopedia of*  
444 *Quantitative Risk Analysis and Assessment* 1 (2008).
- 445 [27] J. J. Egozcue, J. L. Díaz-Barrero, V. Pawlowsky-Glahn, Hilbert space of probability  
446 density functions based on aitchison geometry, *Acta Mathematica Sinica* 22 (2006)  
447 1175–1182.
- 448 [28] P. T. Reiss, R. T. Ogden, Functional principal component regression and functional  
449 partial least squares, *Journal of the American Statistical Association* 102 (2007)  
450 984–996.
- 451 [29] R. G. Ghanem, P. D. Spanos, *Stochastic finite elements: a spectral approach*, Courier  
452 Corporation, 2003.
- 453 [30] C.-Z. Di, C. M. Crainiceanu, B. S. Caffo, N. M. Punjabi, Multilevel functional  
454 principal component analysis, *The annals of applied statistics* 3 (2009) 458.
- 455 [31] S. N. Wood, Stable and efficient multiple smoothing parameter estimation for gen-  
456 eralized additive models, *Journal of the American Statistical Association* 99 (2004)  
457 673–686.
- 458 [32] G. Wahba, Bayesian “confidence intervals” for the cross-validated smoothing spline,  
459 *Journal of the Royal Statistical Society: Series B (Methodological)* 45 (1983) 133–  
460 150.

- 461 [33] D. Nychka, Bayesian confidence intervals for smoothing splines, *Journal of the*  
462 *American Statistical Association* 83 (1988) 1134–1143.
- 463 [34] R. Dezeure, P. Bühlmann, L. Meier, N. Meinshausen, High-dimensional inference:  
464 Confidence intervals, p-values and r-software hdi, *Statistical science* (2015) 533–558.
- 465 [35] Y. Benjamini, Y. Hochberg, Controlling the false discovery rate: a practical and  
466 powerful approach to multiple testing, *Journal of the Royal statistical society: series*  
467 *B (Methodological)* 57 (1995) 289–300.
- 468 [36] Y. Benjamini, D. Yekutieli, et al., The control of the false discovery rate in multiple  
469 testing under dependency, *The annals of statistics* 29 (2001) 1165–1188.
- 470 [37] N. Meinshausen, L. Meier, P. Bühlmann, P-values for high-dimensional regression,  
471 *Journal of the American Statistical Association* 104 (2009) 1671–1681.
- 472 [38] B. N. Ficek, Z. Wang, Y. Zhao, K. T. Webster, J. E. Desmond, A. E. Hillis, C. Fran-  
473 gakis, A. V. Faria, B. Caffo, K. Tsapkini, The effect of tdc on functional connectivity  
474 in primary progressive aphasia, *NeuroImage: Clinical* 19 (2018) 703–715.
- 475 [39] F. P. Oliveira, J. M. R. Tavares, Medical image registration: a review, *Computer*  
476 *methods in biomechanics and biomedical engineering* 17 (2014) 73–93.
- 477 [40] N. E. Breslow, Statistics in epidemiology: the case-control study, *Journal of the*  
478 *American Statistical Association* 91 (1996) 14–28.
- 479 [41] S. W. Greenhouse, Jerome cornfield’s contributions to epidemiology, *Biometrics*  
480 (1982) 33–45.
- 481 [42] V. D. Calhoun, T. Adali, G. D. Pearlson, J. J. Pekar, A method for making group  
482 inferences from functional mri data using independent component analysis, *Human*  
483 *brain mapping* 14 (2001) 140–151.
- 484 [43] R. M. Hutchison, T. Womelsdorf, E. A. Allen, P. A. Bandettini, V. D. Calhoun,  
485 M. Corbetta, S. Della Penna, J. H. Duyn, G. H. Glover, J. Gonzalez-Castillo, et al.,  
486 Dynamic functional connectivity: promise, issues, and interpretations, *Neuroimage*  
487 80 (2013) 360–378.
- 488 [44] W. de Haan, W. M. van der Flier, H. Wang, P. F. Van Mieghem, P. Scheltens, C. J.  
489 Stam, Disruption of functional brain networks in alzheimer’s disease: what can we  
490 learn from graph spectral analysis of resting-state magnetoencephalography?, *Brain*  
491 *connectivity* 2 (2012) 45–55.
- 492 [45] O. Sporns, *Networks of the Brain*, MIT press, 2010.
- 493 [46] E. Bullmore, O. Sporns, Complex brain networks: graph theoretical analysis of  
494 structural and functional systems, *Nature reviews neuroscience* 10 (2009) 186–198.
